# Supplementary material for: Evolutionary Dynamics of Nitrogen Fixation in the Legume–Rhizobia Symbiosis
Source: PubMed Central journal article supplement (PMC3972148; doi:10.1371/journal.pone.0093670), 2014-04-01
Supplement: pone.0093670.s003.pdf [file pone.0093670.s003.pdf]

# Evolutionary Dynamics of Nitrogen Fixation in the Legume–Rhizobia Symbiosis

Hironori Fujita<sup>1\*</sup>, Seishiro Aoki<sup>2</sup>, Masayoshi Kawaguchi<sup>1,3</sup>

<sup>1</sup> Division of Symbiotic Systems, National Institute for Basic Biology, National Institute for Natural Sciences, Okazaki 444-8585, Japan

<sup>2</sup> Department of General Systems Studies, Graduate School of Arts and Sciences, University of Tokyo, 3-8-1 Komaba, Meguro-ku, Tokyo 153-8902, Japan

<sup>3</sup> Department of Basic Biology, School of Life Science, Graduate University for Advanced Studies (SOKENDAI), Okazaki 444-8585, Japan

\* E-mail: hfujita@nibb.ac.jp

## Supporting Information

### Text S1. Theoretical framework of adaptive dynamics

#### S1.1. Invasibility of mutants

Here, we briefly introduce the theoretical framework of adaptive dynamics. This framework underlies the evolutionary dynamics of a quantitative trait with a frequency-dependent selection [1,2]. Let  $f_x(y)$  be the growth rate (or fitness) of rare mutants adopting strategy  $y$ , when they invade a resident population adopting strategy  $x$ .

The relative growth rate between the mutant and the resident is given by

$$w(x, y) \equiv f_x(y) - f_x(x). \quad (\text{S1.1})$$

This function determines the invasibility of the mutant into the resident population. If  $w(x, y) > 0$ , the mutant can invade; if  $w(x, y) < 0$ , it cannot.

#### S1.2. Selection gradient

If  $x$  and  $y$  are very similar to one another (i.e.  $|y - x| \ll 1$ ), the relative growth rate is

expressed by

$$w(x, y) = D(x)(y - x) + E(x)(y - x)^2/2 + O(y - x)^3, \quad (\text{S1.2})$$

where  $D(x) \equiv \partial f_x(y)/\partial y|_{y=x}$  and  $E(x) \equiv \partial^2 f_x(y)/\partial y^2|_{y=x}$ . Thus, the invisibility is approximately linear, and we have  $w(x, y) = (y - x)D(x)$ . Here,  $D(x)$  is termed the “selection gradient” because its sign represents the direction of evolution. If  $D(x) > 0$ , the resident population with  $x$  can be invaded by mutants with  $y > x$  because  $w(x, y) > 0$ ; conversely, if  $y < x$ , the mutants cannot invade because  $w(x, y) < 0$ . In this way, the population evolves towards larger strategies by repeat replacement of existing residents by higher-performing mutants. Conversely, if  $D(x) < 0$ , only mutants with  $y < x$  can invade and replace the resident population, which drives the population toward smaller strategies.

### **S1.3. Evolutionarily singular strategy**

The strategy  $x^*$  satisfying  $D(x^*) = 0$ , where mutant invasibility is reversed, is called an evolutionarily singular strategy. If a singular strategy  $x^*$  satisfies  $D'(x^*) < 0$  (i.e.  $D(x) > 0$  for  $x < x^*$  and  $D(x) < 0$  for  $x > x^*$ ), then  $x^*$  is “convergence stable” (CS). In this case, a monomorphic population with a similar phenotype can be invaded by mutants whose strategies approach  $x^*$ . Conversely, if  $D'(x^*) > 0$  then  $x^*$  is convergence unstable and the population can be invaded by mutants adopting quite different strategies from  $x^*$ .

### **S1.4. Evolutionarily stable strategy (ESS)**

If a singular strategy  $x^*$  is CS (i.e.  $D(x^*) = 0$  and  $D'(x^*) < 0$ ), the evolutionary stability of the population with  $x^*$  depends on the sign of  $w(x^*, y) = E(x^*)(y - x^*)^2/2$ , namely,

the sign of  $E(x^*)$ . If  $x^*$  satisfies  $E(x^*) < 0$  (i.e.  $w(x^*, y) < 0$ ) for any nearby  $y$ , then  $x^*$  is called an “evolutionarily stable strategy” (ESS). In this case, the population is robust against invasion by mutants with similar strategies. Accordingly, when the singular strategy  $x^*$  is CS and ESS (i.e.  $D(x^*) = 0$ ,  $D'(x^*) < 0$ , and  $E(x^*) < 0$ ), a monomorphic population evolves toward  $x^*$ , where it is stably maintained without invasion by similar-phenotype mutants.

### **S1.5. Evolutionary branching**

Conversely, if  $E(x^*) > 0$  (i.e.  $w(x^*, y) > 0$  for any nearby  $y$ ), then  $x^*$  is ESS-unstable. Interestingly, such a singular strategy, that is CS but not ESS-stable (i.e.  $D(x^*) = 0$ ,  $D'(x^*) < 0$ , and  $E(x^*) > 0$ ), can induce species speciation or “evolutionary branching”, in which a monomorphic population with  $x^*$  is invaded by nearby mutants and subsequently forms two subpopulations with higher and lower strategies than the original  $x^*$ .

### **References**

1. Geritz S, Kisdi E, Meszina G, Metz J (1998) Evolutionarily singular strategies and the adaptive growth and branching of the evolutionary tree. *Evol Ecol* 12: 35-57.
2. Waxman D, Gavrillets S (2005) 20 questions on adaptive dynamics. *J Evol Biol* 18: 1139-1154.
