# Supplementary material for: Evolutionary Dynamics of Nitrogen Fixation in the Legume–Rhizobia Symbiosis
Source: PubMed Central journal article supplement (PMC3972148; doi:10.1371/journal.pone.0093670), 2014-04-01
Supplement: pone.0093670.s004.pdf [file pone.0093670.s004.pdf]

# Evolutionary Dynamics of Nitrogen Fixation in the Legume–Rhizobia Symbiosis

Hironori Fujita<sup>1\*</sup>, Seishiro Aoki<sup>2</sup>, Masayoshi Kawaguchi<sup>1,3</sup>

<sup>1</sup> Division of Symbiotic Systems, National Institute for Basic Biology, National Institute for Natural Sciences, Okazaki 444-8585, Japan

<sup>2</sup> Department of General Systems Studies, Graduate School of Arts and Sciences, University of Tokyo, 3-8-1 Komaba, Meguro-ku, Tokyo 153-8902, Japan

<sup>3</sup> Department of Basic Biology, School of Life Science, Graduate University for Advanced Studies (SOKENDAI), Okazaki 444-8585, Japan

\* E-mail: hfujita@nibb.ac.jp

## Supporting Information

### Text S2. Increasing cost function ( $C'(x) > 0$ )

Because the benefit function  $B(x) \geq 0$  is an increasing function of  $x$ , we have

$$B(\bar{x}) < B(x) \text{ for } y < \bar{x} < x \text{ and } B(\bar{x}) > B(x) \text{ for } y > \bar{x} > x, \quad (\text{S2.1})$$

where  $\bar{x} = ((n-1)x + y)/n$ . If the cost function  $C(x) \geq 0$  is a similarly increasing function of  $x$ , then

$$C(y) < C(x) \text{ for } y < x \text{ and } C(y) > C(x) \text{ for } y > x. \quad (\text{S2.2})$$

From Eqs. (S2.1) and (S2.2), the following conditions must be met:

$$B(\bar{x})C(y) < B(x)C(x) \text{ for } y < x \text{ and } B(\bar{x})C(y) > B(x)C(x) \text{ for } y > x. \quad (\text{S2.3})$$

Because the invasibility of mutant  $y$  is  $w(x, y) = B(\bar{x})C(y) - B(x)C(x)$ , we obtain

$$w(x, y) < 0 \text{ for } y < x \text{ and } w(x, y) > 0 \text{ for } y > x. \quad (\text{S2.4})$$

This invasibility condition is identical to that of case (ii) “Maximum evolution” in section 3.1 (Figure 2C). That is, a resident population can be invaded and replaced by

mutants adopting higher strategies, but not by those adopting lower strategies. This result shows that the maximum activity of nitrogen fixation ( $x = 1$ ) will evolve and stably persist if both  $B(x)$  and  $C(x)$  are increasing functions of  $x$ .
