# Supplementary material for: Evolutionary Dynamics of Nitrogen Fixation in the Legume–Rhizobia Symbiosis
Source: PubMed Central journal article supplement (PMC3972148; doi:10.1371/journal.pone.0093670), 2014-04-01
Supplement: pone.0093670.s005.pdf [file pone.0093670.s005.pdf]

# Evolutionary Dynamics of Nitrogen Fixation in the Legume–Rhizobia Symbiosis

Hironori Fujita<sup>1\*</sup>, Seishiro Aoki<sup>2</sup>, Masayoshi Kawaguchi<sup>1,3</sup>

<sup>1</sup> Division of Symbiotic Systems, National Institute for Basic Biology, National Institute for Natural Sciences, Okazaki 444-8585, Japan

<sup>2</sup> Department of General Systems Studies, Graduate School of Arts and Sciences, University of Tokyo, 3-8-1 Komaba, Meguro-ku, Tokyo 153-8902, Japan

<sup>3</sup> Department of Basic Biology, School of Life Science, Graduate University for Advanced Studies (SOKENDAI), Okazaki 444-8585, Japan

\* E-mail: hfujita@nibb.ac.jp

## Supporting Information

### Text S3. Linear cost function ( $c_N = 0$ )

If the cost function is linear (i.e.  $c_N = 0$ ), the selection gradient is

$$D(x) = \left\{ (n+2)b_N bcx^2 - (c + nc + 2b_N)bx + b - nc \right\} / n, \quad (\text{S3.1})$$

which is always a decreasing function of  $x$  because

$$D'(x) = -b \left\{ (n+1)c(1 - 2b_N x) + 2b_N(1 - cx) \right\} / n < 0. \quad (\text{S3.2})$$

Furthermore, we have

$$E(x) = \partial^2 f_x(y) / \partial y^2 \Big|_{y=x} = -2b \left\{ nc(1 - 2b_N x) + b_N(1 - cx) \right\} / n^2 < 0. \quad (\text{S3.3})$$

Thus our model predicts the following three evolutionary behaviors.

#### S3.1. Case (i) No evolution

Because  $D(x)$  is a decreasing function, we have  $D(x) < 0$  for  $0 < x < 1$  and  $D(0) < 0$  (i.e.  $c > c_0 = b/n$ ) (Figures 2A and S1, gray). This condition corresponds to case (i) “No

evolution” in section 3.1.1.

### S3.2. Case (ii) Maximum evolution

The opposite case is  $D(x) > 0$  for  $0 < x < 1$ , and  $D(1) > 0$  (i.e.  $c < c_1 = (1 - 2b_N)b / \{n + (n + 1 - nb_N - 2b_N)b\}$ ) (Figures 2A and S1, magenta). This condition corresponds to case (ii) “Maximum evolution” in section 3.1.2.

### S3.3. Case (iii) Intermediate evolution

Between these two extremes (i.e.  $c_1 < c < c_0$ ) (Figures 2A and S1, blue), a unique singular strategy  $0 < x^* < 1$  is found:

$$x^* = (b - nc) / (n + 1)bc \quad (\text{for } b_N = 0), \quad (\text{S3.4a})$$

$$x^* = \left\{ (c + nc + 2b_N) - \sqrt{\det} \right\} / 2(n + 2)b_N bc \quad (\text{for } b_N \neq 0), \quad (\text{S3.4b})$$

where  $\det = b^2(c + nc + 2b_N)^2 - 4(n + 2)b_N bc(b - nc)$ . This singular strategy  $x^*$  is always CS and ESS-stable (i.e.  $D'(x^*) < 0$  and  $E(x^*) < 0$ ) (Eqs. (S3.2) and (S3.3)). This condition corresponds to case (iii) “Intermediate evolution” in section 3.1.3.

### S3.4. Invasibility of cheating rhizobia

In the resident population with strategy  $x$ , the invasibility of cheating bacteria ( $y = 0$ ) is determined by the sign of

$$w(x, 0) = -xD(x) + x^2 E(x) / 2 - b_N bc x^3 / n^2. \quad (\text{S3.5})$$

By Eq. (S3.3), the second term of the right hand side of Eq. (S3.5) is negative. Thus we have  $w(1, 0) < 0$  because  $D(1) > 0$  in case (ii), and  $w(x^*, 0) < 0$  because  $D(x^*) = 0$  in case (iii). This result shows that, in both cases (ii) and (iii), cheating rhizobia cannot invade the resident population.
