# Supplementary material for: Evolutionary Dynamics of Nitrogen Fixation in the Legume–Rhizobia Symbiosis
Source: PubMed Central journal article supplement (PMC3972148; doi:10.1371/journal.pone.0093670), 2014-04-01
Supplement: pone.0093670.s007.pdf [file pone.0093670.s007.pdf]

# Evolutionary Dynamics of Nitrogen Fixation in the Legume–Rhizobia Symbiosis

Hironori Fujita<sup>1\*</sup>, Seishiro Aoki<sup>2</sup>, Masayoshi Kawaguchi<sup>1,3</sup>

<sup>1</sup> Division of Symbiotic Systems, National Institute for Basic Biology, National Institute for Natural Sciences, Okazaki 444-8585, Japan

<sup>2</sup> Department of General Systems Studies, Graduate School of Arts and Sciences, University of Tokyo, 3-8-1 Komaba, Meguro-ku, Tokyo 153-8902, Japan

<sup>3</sup> Department of Basic Biology, School of Life Science, Graduate University for Advanced Studies (SOKENDAI), Okazaki 444-8585, Japan

\* E-mail: hfujita@nibb.ac.jp

## Supporting Information

### Text S5. Systemic and local effects of nitrogen fixation

If the fitness is described as the product of the systemic and local effects, we have

$$\varphi_i = S(\bar{x})L(x_i) \quad \text{and} \quad \bar{x} = \sum_{k=1}^n x_k / n, \quad (\text{S5.1})$$

where  $S(x)$  and  $L(x)$  are the systemic and local functions, respectively. The fitness of rare mutants with activity  $y$  in a resident population with activity  $x$  is then given by

$$f_x(y) = S(\bar{x})L(y) \quad \text{and} \quad \bar{x} = ((n-1)x + y)/n. \quad (\text{S5.2})$$

Thus, we have

$$D(x) = \partial f_x(y) / \partial y \Big|_{y=x} = S'(x)L(x)/n + S(x)L'(x), \quad (\text{S5.3})$$

$$E(x) = \partial^2 f_x(y) / \partial y^2 \Big|_{y=x} = S''(x)L(x)/n^2 + 2S'(x)L'(x)/n + S(x)L''(x), \quad (\text{S5.4})$$

$$w(1,0) = f_1(0) - f_1(1) = S(1-1/n)L(0) - S(1)L(1). \quad (\text{S5.5})$$

We then obtain

$$D(x) = L'(x), \quad D'(x) = L''(x), \quad E(x) = L''(x), \quad \text{and} \quad w(1,0) = L(0) - L(1) \quad (\text{S5.6})$$

in the absence of the systemic effect (i.e.  $S(x) = 1$ ), and

$$D(x) = S'(x)/n, \quad D'(x) = S''(x)/n, \quad E(x) = S''(x)/n^2, \quad \text{and} \quad w(1,0) = S(1 - 1/n) - S(1) \quad (\text{S5.7})$$

in the absence of the local effect (i.e.  $L(x) = 1$ ).

The coexistence of nitrogen-fixing and cheating rhizobia can arise via two pathways: evolutionary branching and null mutation. Coexistence by evolutionary branching requires that  $x^*$  is CS but not ESS-stable (i.e.  $D'(x^*) < 0$  and  $E(x^*) > 0$ ), where  $x^*$  is an evolutionarily stable strategy (i.e.  $D(x^*) = 0$ ). In the cases of  $S(x) = 1$  and  $L(x) = 1$ , this type of coexistence cannot emerge, because the signs of  $D'(x)$  and  $E(x)$  are always the same (Eqs. (S5.6) and (S5.7)). Conversely, coexistence by null mutation is possible if both  $D(x) > 0$  for  $0 < x < 1$  and  $w(1,0) > 0$  are satisfied. However, if  $D(x) > 0$ ,  $L(x)$  or  $S(x)$  is an increasing function of  $x$ , which contradicts  $w(1,0) > 0$  (i.e.  $L(0) > L(1)$  or  $S(1 - 1/n) > S(1)$ , respectively). Consequently, this type of coexistence is also precluded. Therefore, mutualists and cheaters stably exist only if the fitness function includes both systemic and local effects.
